# Supplementary material for: Comparison of circulating metabolite concentrations in dogs and cats when allowed to freely choose macronutrient intake
Source: PubMed Central journal article supplement (PMC6262854; doi:10.1242/bio.036228), 2018-09-26
Supplement: biolopen-7-036228-s1.pdf [file biolopen-7-036228-s1.pdf]

**Table S1.** Heat map of the complete dataset for canine and feline plasma metabolites. Red and green shaded cells indicate  $P = 0.05$  (red indicates that the mean values are significantly higher for that comparison; green values are significantly lower). Light red and light green shaded cells indicate  $0.05 < P < 0.10$  (light red indicates that the mean values trend higher for that comparison; light green values trend lower).

[Click here to Download Table S1](#)
